# Supplementary material for: Multivalent Chromosomal Expression of the Clostridium botulinum Serotype A Neurotoxin Heavy-Chain Antigen and the Bacillus anthracis Protective Antigen in Lactobacillus acidophilus
Source: PubMed Central journal article supplement (PMC5068166; doi:10.1128/aem.01533-16), 2016-09-30
Supplement: AEM.01533-16_zam999117452so1.pdf [file AEM.01533-16_zam999117452so1.pdf]

Multivalent chromosomal expression of the *Clostridium botulinum* serotype A neurotoxin heavy chain antigen and *Bacillus anthracis* protective antigen in *Lactobacillus acidophilus*

O’Flaherty and Klaenhammer

**Supplementary Figures and Tables:**

**Table S1:** Differentially expressed genes from pairwise comparisons shown in Fig. 4

| Name                                                   | locus_tag | Differential Expression Ratio | Differential Expression Log2 Ratio | Differential Expression Absolute Confidence | Differential Expression p-value |
|--------------------------------------------------------|-----------|-------------------------------|------------------------------------|---------------------------------------------|---------------------------------|
| <b>NCK2310 vs. NCK1909 (BoNT/A vs. Control)</b>        |           | <b>NCK2310/<br/>NCK1909</b>   |                                    |                                             |                                 |
| ABC transporter permease                               | LBA1679   | 11.9                          | 3.6                                | 1000                                        | 0.00E+00                        |
| ABC transporter ATP-binding protein                    | LBA1680   | 11.3                          | 3.5                                | 1000                                        | 0.00E+00                        |
| hypothetical protein                                   | LBA1184   | 6.8                           | 2.8                                | 1000                                        | 0.00E+00                        |
| hypothetical protein                                   | LBA1186   | 5.9                           | 2.6                                | 1000                                        | 0.00E+00                        |
| OppA                                                   | LBA1665   | 5.7                           | 2.5                                | 1000                                        | 0.00E+00                        |
| hypothetical protein                                   | LBA1187   | 4.8                           | 2.2                                | 1000                                        | 0.00E+00                        |
| hypothetical protein                                   | LBA0485   | -3.9                          | -2                                 | 1000                                        | 0.00E+00                        |
| hypothetical protein                                   | LBA1791   | -5.6                          | -2.5                               | 15.9                                        | 1.20E-16                        |
| hypothetical protein                                   | LBA0486   | -7.6                          | -2.9                               | 1000                                        | 0.00E+00                        |
| hypothetical protein                                   | LBA1072   | -7.7                          | -2.9                               | 6.9                                         | 1.40E-07                        |
| hypothetical protein                                   | LBA1803   | -7.8                          | -3                                 | 13.4                                        | 4.40E-14                        |
| hypothetical protein                                   | LBA1789   | -10                           | -3.3                               | 10.1                                        | 7.10E-11                        |
| transposase                                            | LBA1723   | -13                           | -3.7                               | 1000                                        | 0.00E+00                        |
| hypothetical protein                                   | LBA0509   | -17.1                         | -4.1                               | 9.9                                         | 1.30E-10                        |
| hypothetical protein                                   | LBA0490   | -20.7                         | -4.4                               | 1000                                        | 0.00E+00                        |
| hypothetical protein                                   | LBA1756   | -25.4                         | -4.7                               | 1000                                        | 0                               |
| hypothetical protein                                   | LBA0508   | -27.5                         | -4.8                               | 7.6                                         | 2.50E-08                        |
| hypothetical protein                                   | LBA1801   | -37.6                         | -5.2                               | 22.4                                        | 3.90E-23                        |
| hypothetical protein                                   | LBA1802   | -50.1                         | -5.6                               | 23.8                                        | 1.70E-24                        |
| <b>NCK2326 vs. NCK1909 (PA vs. Control)</b>            |           | <b>NCK2326/<br/>NCK1909</b>   |                                    |                                             |                                 |
| hypothetical protein                                   | LBA0888   | 37.5                          | 5.2                                | 1000                                        | 0                               |
| DNA-damage-inducible protein J                         | LBA1565   | 6.8                           | 2.8                                | 1000                                        | 0                               |
| hypothetical protein                                   | LBA1564   | 6.7                           | 2.7                                | 1000                                        | 0                               |
| aggregation promoting protein                          | LBA0493   | 4.6                           | 2.2                                | 1000                                        | 0                               |
| flavodoxin                                             | LBA1563   | 4.3                           | 2.1                                | 1000                                        | 0                               |
| hypothetical protein                                   | LBA0133   | 4.1                           | 2                                  | 1000                                        | 0                               |
| ABC transporter ATP-binding protein/permease           | LBA1276   | 4.1                           | 2                                  | 1000                                        | 0                               |
| LysA CDS                                               | LBA1918   | 4.1                           | 2                                  | 1000                                        | 0                               |
| ABC transporter permease CDS                           | LBA0321   | 3.9                           | 2                                  | 1000                                        | 0                               |
| PTS system cellobiose-specific transporter subunit IIC | LBA0876   | -4.1                          | -2                                 | 1000                                        | 0                               |

|                                 |         |       |      |      |           |
|---------------------------------|---------|-------|------|------|-----------|
| kanamycin kinase                | LBA1348 | -4.1  | -2   | 8.1  | 7.9E-09   |
| GlgC                            | LBA0681 | -4.2  | -2.1 | 17.8 | 1.7E-18   |
| heavy-metal-transporting ATPase | LBA0542 | -4.3  | -2.1 | 40.4 | 4.2E-41   |
| GlgB                            | LBA0680 | -4.3  | -2.1 | 20.2 | 6E-21     |
| AckA                            | LBA1873 | -4.4  | -2.1 | 6.3  | 5.3E-07   |
| hypothetical protein            | LBA1797 | -5    | -2.3 | 27.4 | 3.7E-28   |
| cysteine synthase               | LBA1088 | -5.5  | -2.5 | 6.3  | 4.8E-07   |
| hypothetical protein            | LBA1803 | -7.5  | -2.9 | 15.3 | 4.9E-16   |
| transposase                     | LBA1723 | -9.1  | -3.2 | 1000 | 0         |
| hypothetical protein            | LBA1791 | -9.9  | -3.3 | 23.1 | 8.9E-24   |
| hypothetical protein            | LBA0486 | -10.6 | -3.4 | 1000 | 0         |
| HAD family hydrolase            | LBA0564 | -10.8 | -3.4 | 6    | 0.0000009 |
| hypothetical protein            | LBA0509 | -11.8 | -3.6 | 9.7  | 2.1E-10   |
| hypothetical protein            | LBA1802 | -11.9 | -3.6 | 21   | 1.1E-21   |
| hypothetical protein            | LBA0508 | -13.8 | -3.8 | 6.9  | 1.2E-07   |
| hypothetical protein            | LBA1801 | -13.9 | -3.8 | 21.3 | 4.7E-22   |
| hypothetical protein            | LBA0490 | -22   | -4.5 | 1000 | 0         |
| hypothetical protein            | LBA1756 | -23.6 | -4.6 | 1000 | 0         |

**NCK2345 vs. NCK1909 (BoNT/A and PA vs. Control)**

**NCK2345/  
NCK1909**

|                                                      |         |       |      |      |          |
|------------------------------------------------------|---------|-------|------|------|----------|
| hypothetical protein                                 | LBA0888 | 20.9  | 4.4  | 1000 | 0        |
| OppA                                                 | LBA1665 | 17.2  | 4.1  | 1000 | 0.00E+00 |
| ABC transporter                                      | LBA1044 | 8.5   | 3.1  | 1000 | 0.00E+00 |
| glutamine ABC transporter ATP-binding protein        | LBA1045 | 8.3   | 3.1  | 1000 | 0.00E+00 |
| glutamine ABC transporter substrate-binding protein  | LBA1046 | 6.3   | 2.6  | 1000 | 0.00E+00 |
| DNA-damage-inducible protein J                       | LBA1565 | 5.1   | 2.4  | 1000 | 0        |
| glutamine ABC transporter membrane spanning permease | LBA1042 | 5     | 2.3  | 1000 | 0.00E+00 |
| ABC transporter permease                             | LBA1679 | 4.9   | 2.3  | 1000 | 0.00E+00 |
| maltose phosphorylase                                | LBA1870 | 4.9   | 2.3  | 1000 | 0.00E+00 |
| hypothetical protein                                 | LBA1184 | 4.4   | 2.1  | 1000 | 0.00E+00 |
| hypothetical protein                                 | LBA1564 | 4.3   | 2.1  | 1000 | 0.00E+00 |
| ABC transporter ATP-binding protein                  | LBA1680 | 4.2   | 2.1  | 1000 | 0.00E+00 |
| hypothetical protein                                 | LBA1186 | 3.9   | 2    | 1000 | 0.00E+00 |
| hypothetical protein                                 | LBA0485 | -3.9  | -2   | 1000 | 0.00E+00 |
| hypothetical protein                                 | LBA1694 | -4.1  | -2   | 6.6  | 2.80E-07 |
| transcriptional regulator family protein             | LBA1444 | -4.4  | -2.1 | 7.9  | 1.10E-08 |
| general stress response                              | LBA0017 | -4.8  | -2.3 | 1000 | 0        |
| kanamycin kinase                                     | LBA1348 | -4.9  | -2.3 | 8.6  | 2.50E-09 |
| hypothetical protein                                 | LBA1802 | -5.8  | -2.5 | 13.9 | 1.10E-14 |
| hypothetical protein                                 | LBA0486 | -6.6  | -2.7 | 1000 | 0.00E+00 |
| hypothetical protein                                 | LBA1789 | -6.7  | -2.7 | 8.6  | 2.40E-09 |
| hypothetical protein                                 | LBA0490 | -7.5  | -2.9 | 1000 | 0.00E+00 |
| hypothetical protein                                 | LBA1801 | -8    | -3   | 15.5 | 3.20E-16 |
| transposase                                          | LBA1723 | -10.3 | -3.4 | 1000 | 0.00E+00 |

|                                                         |         |                             |      |      |          |
|---------------------------------------------------------|---------|-----------------------------|------|------|----------|
| hypothetical protein                                    | LBA1756 | -15                         | -3.9 | 1000 | 0        |
| hypothetical protein                                    | LBA0509 | -16.9                       | -4.1 | 9.8  | 1.60E-10 |
| <b>NCK2326 vs. NCK2310<br/>(PA vs. BoNT/A)</b>          |         | <b>NCK2326/<br/>NCK2310</b> |      |      |          |
| hypothetical protein                                    | LBA0888 | 15.3                        | 3.9  | 1000 | 0        |
| <b>NCK2310 V NCK2345<br/>(BoNT/A V BoNT/A and PA)</b>   |         | <b>NCK2310/<br/>NCK2345</b> |      |      |          |
| hypothetical protein                                    | LBA0888 | 27.3                        | 4.8  | 1000 | 0        |
| aggregation promoting protein                           | LBA0493 | 4.1                         | 2    | 41.8 | 1.50E-42 |
| ABC transporter ATP-binding protein/permease            | LBA1357 | 3.9                         | 2    | 15.4 | 3.80E-16 |
| hypothetical protein                                    | LBA1187 | -4.4                        | -2.1 | 1000 | 0.00E+00 |
| ABC transporter ATP-binding protein                     | LBA1188 | -5                          | -2.3 | 1000 | 0.00E+00 |
| GntR                                                    | LBA1189 | -6.1                        | -2.6 | 1000 | 0.00E+00 |
| ABC transporter permease                                | LBA1679 | -13.2                       | -3.7 | 1000 | 0.00E+00 |
| ABC transporter ATP-binding protein                     | LBA1680 | -19                         | -4.2 | 1000 | 0.00E+00 |
| <b>NCK2345 vs. NCK2326<br/>(BoNT/A and PA vs. PA)</b>   |         | <b>NCK2345/<br/>NCK2326</b> |      |      |          |
| hypothetical protein                                    | LBA1797 | 9.6                         | 3.3  | 1000 | 0        |
| ABC transporter                                         | LBA1044 | 7.7                         | 2.9  | 1000 | 0        |
| glutamine ABC transporter ATP-binding protein           | LBA1045 | 7.4                         | 2.9  | 1000 | 0        |
| ABC transporter ATP-binding protein                     | LBA1680 | 7.3                         | 2.9  | 1000 | 0        |
| OppA                                                    | LBA1665 | 7                           | 2.8  | 1000 | 0        |
| glutamine ABC transporter membrane spanning<br>permease | LBA1042 | 5.9                         | 2.6  | 34.2 | 6.80E-35 |
| ABC transporter permease                                | LBA1679 | 5.5                         | 2.5  | 1000 | 0        |
| hypothetical protein                                    | LBA1800 | 5                           | 2.3  | 1000 | 0        |
| glutamine ABC transporter substrate-binding protein     | LBA1046 | 4.7                         | 2.2  | 1000 | 0        |
| PacL                                                    | LBA1683 | -4.3                        | -2.1 | 7.5  | 3.20E-08 |

**A**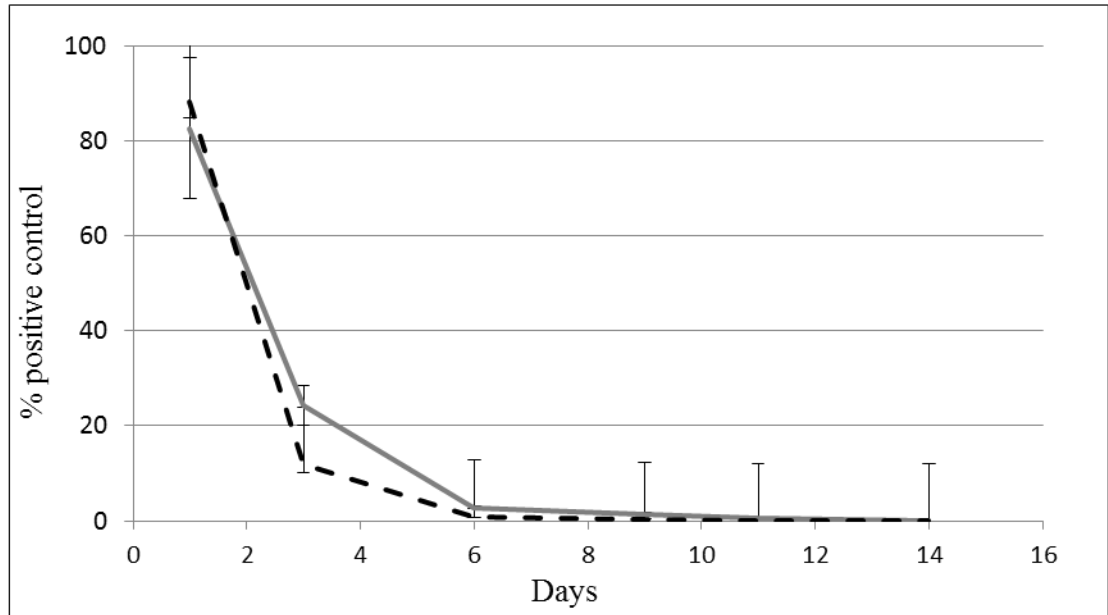**B**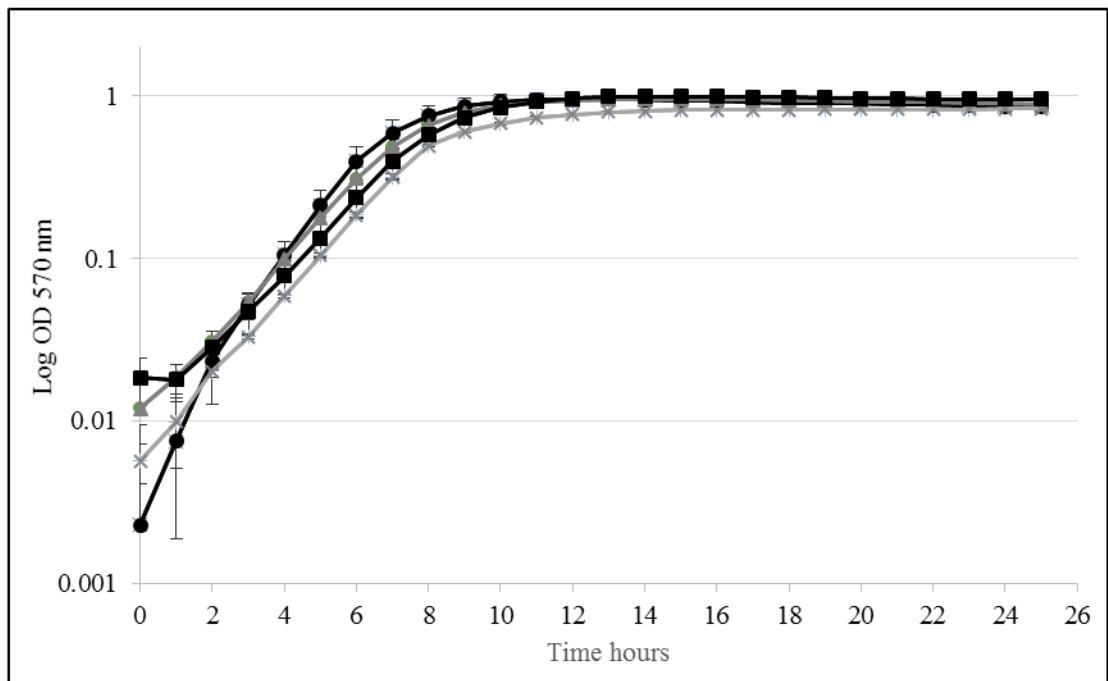

**Supplemental Figure 1. Plasmid stability assays and growth curves. (A)** *L. acidophilus* NCK1839 and NCK2307 were grown for 14 days and plated on MRS agar plates with and without the presence of erythromycin to determine plasmid stability of pTRK1074 expressing BoNT/A (dashed line) and pTRK896 expressing PA (black line). Error bars indicate the standard deviation of the mean. **(B)** *L. acidophilus* NCK1909 (control, black circles), NCK2310 (BoNT/A, grey triangle), NCK2326 (PA, grey X) and NCK2345 (BoNT/A and PA, black square) were grown in MRS broth for 25 hours at 37°C. Error bars indicate the standard deviation of the mean.
